# Supplementary material for: Infinite-layer/perovskite oxide heterostructure-induced high-spin states in SrCuO2/SrRuO3 bilayer films
Source: Royal Society of Chemistry journal article supplement (doi:10.1039/d1mh01385h), 2021-01-01

Supporting Information

**Infinite-Layer/Perovskite Oxide Heterostructure Induced High-Spin States in SrCuO<sub>2</sub>/SrRuO<sub>3</sub> Bilayer Films**

Zhe Li<sup>1,2,†</sup>, Xiaobing Chen<sup>1,2,†</sup>, Yuansha Chen<sup>1,2,3\*</sup>, Qinghua Zhang<sup>1,2</sup>, Hui Zhang<sup>1,2</sup>, Jine Zhang<sup>1,2</sup>, Wenxiao Shi<sup>1,2</sup>, Bin He<sup>4</sup>, Jinxing Zhang<sup>5</sup>, Jinghua Song<sup>1,2</sup>, Furong Han<sup>1,2</sup>, Banggui Liu<sup>1,2</sup>, Lin Gu<sup>1,2</sup>, Fengxia Hu<sup>1,2</sup>, Yunzhong Chen<sup>1,2</sup>, Baogen Shen<sup>1,2</sup>, and Jirong Sun<sup>1,2,4,6#</sup>

<sup>1</sup> Beijing National Laboratory for Condensed Matter Physics and Institute of Physics, Chinese Academy of Sciences, Beijing 100190, China

<sup>2</sup> School of Physical Sciences, University of Chinese Academy of Sciences, Beijing 100049, China

<sup>3</sup> Fujian Innovation Academy, Chinese Academy of Sciences, Fuzhou, Fujian 350108, China

<sup>4</sup> Spintronics Institute, School of Physics and Technology, University of Jinan, Jinan 250022, China

<sup>5</sup> Department of Physics, Beijing Normal University, Beijing 100875, China

<sup>6</sup> Songshan Lake Materials Laboratory, Dongguan, Guangdong 523808, China

† These authors contributed equally to this work.

E-mail: [\\*yschen@iphy.ac.cn](mailto:yschen@iphy.ac.cn); [#jrsun@iphy.ac.cn](mailto:#jrsun@iphy.ac.cn)

**KEYWORDS:** infinite layer, heterointerface, RuO<sub>5</sub>-pyramids, high spin state, orbital polarization

**Figure S1.** (a) Atomic force microscope (AFM) topography ( $3\ \mu\text{m} \times 3\ \mu\text{m}$ ) of the SrTiO<sub>3</sub> (001) surface annealed at 1000 °C. Surface with regular terraces and steps is shown. (b) Height profile along the blue arrow marked in (a). Red dashed lines mark the height of a typical step.

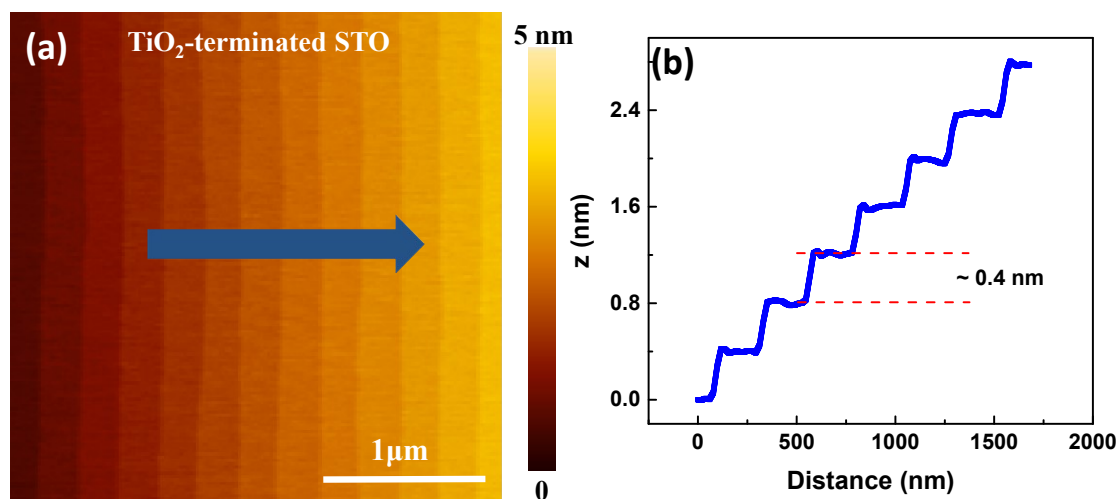

In the process of sample preparation, the SrTiO<sub>3</sub> sample was treated by the standard chemical etching and thermal annealing method. All SrTiO<sub>3</sub> (001) substrates were first etched in aqua regia-based solution and then annealed in oxygen flow at 1000 °C for 2h. This procedure causes a recrystallization of substrate surface, leading to TiO<sub>2</sub>-terminated surface. As shown by Fig. S1(a), regular-structured substrate surface appears, with relatively flat terrace planes and uniformly-spaced steps. The height of the step is about 0.4 nm, close to the lattice constant of SrTiO<sub>3</sub>.<sup>1</sup> According to the literature using similar thermal treatment,<sup>2,3</sup> we believed that a single TiO<sub>2</sub> termination layer was formed for each terrace plane.

1. M. R. Castell, Surf. Sci 505, 1 (2002).
2. N. P. Guisinger et.al, ACS Nano 3, 4132 (2009).
3. W. H. Zhang et. al, Chin. Phys. Lett. 31, 017401 (2014).

**Figure S2.** X-ray reflectivity (XRR) of the (a) SRO and (b) SCO bare films grown on the (001)-oriented STO substrates with the same deposition time of 4 min. Good agreements between fitting curves (red) and experimental curves (black) are clearly demonstrated. The simulation curve is realized by the commercial software of DIFFRAC<sup>plus</sup> LEPTOS 7. The deduced thickness of SRO layers is 13 uc and the thickness of SCO layer is 18 uc.

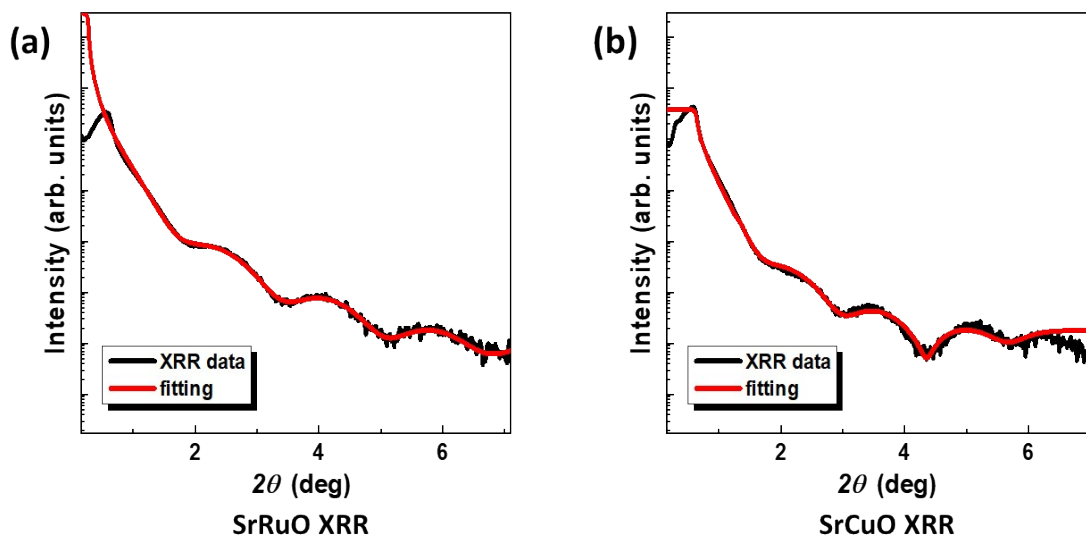

**Figure S3.** (a) ~ (h)  $M$ - $T$  curves of 5, 6, 7, 8, 9, 11, 13 and 16 uc SRO bare layers (red line) and bilayers (blue line) covered with the same  $\text{SCO}_{40}$  layer.  $M$ - $T$  curves were measured in the field cooling mode with an out-of-plane magnetic field of 500 Oe. We can see that the SCO capping layer has induced a remarkable increase in  $T_c$  for the SRO layers thinner than 11 uc. The magnetization extracted from the  $M$ - $T$  curves for the bilayer films is smaller than that of corresponding bare films. It is because the SCO capping layer has also enhanced the  $H_c$  of the bottom SRO layer. (i) The out-of-plane  $M$ - $H$  curves of  $\text{SRO}_{16}$  bare layer (red line) and  $\text{SCO}_{40}/\text{SRO}_{16}$  bilayer (blue line) at 10K.

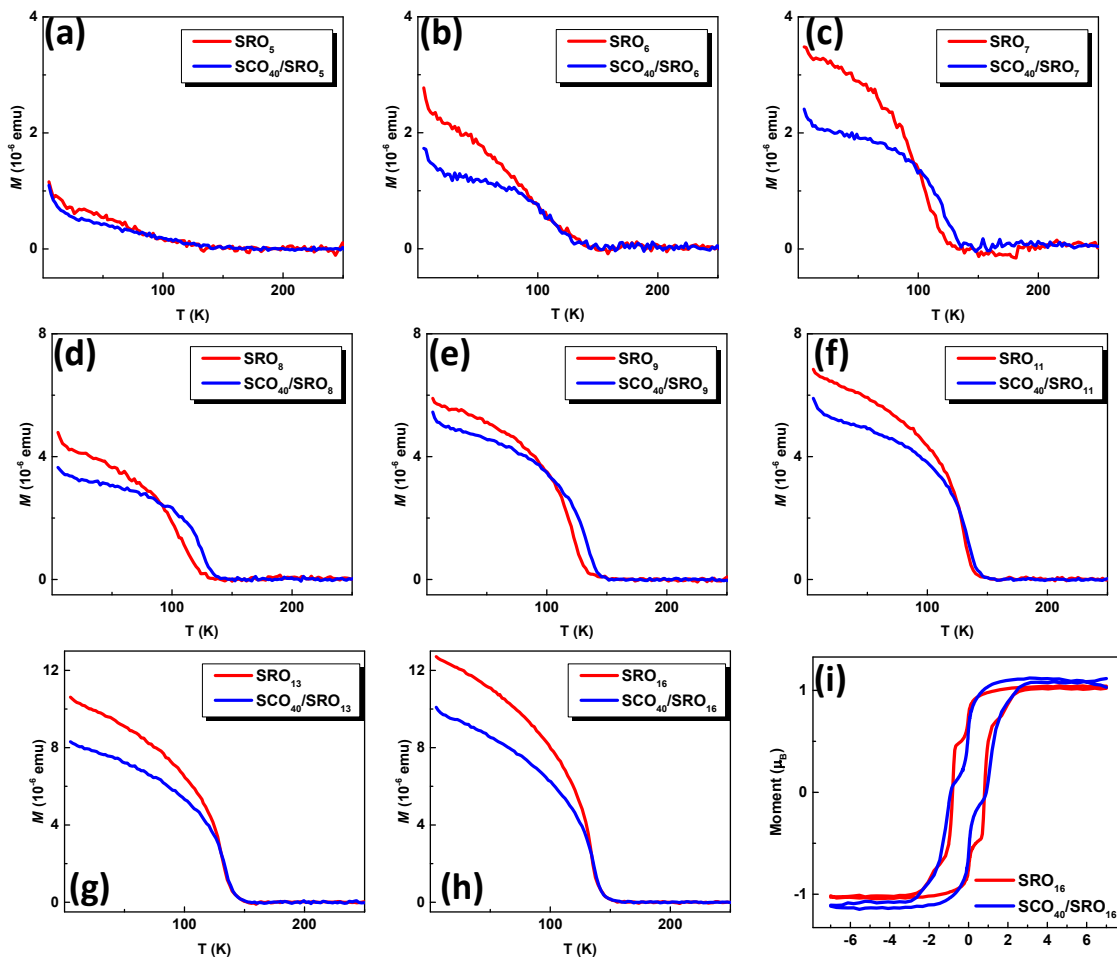

**Figure S4.** (a) Structural model of a  $\text{SCO}_4/\text{SRO}_5$  heterostructure with the  $[\text{CuO}_2]$ - $[\text{Sr}]$ - $[\text{RuO}_2]$  type interface for DFT calculations. The green, gray, blue and red dots represent the Sr, Ru, Cu and O ions, respectively. (b) DFT-resulted DOS on Ru, O and Sr sites for the five SRO layers, from the interfacial 1<sup>st</sup> layer to the 3<sup>rd</sup>, 4<sup>th</sup> and 5<sup>th</sup> inner layers. (c) Total  $M_s$  for each SRO layer. The largest  $M_s$  reaches  $\sim 2.8 \mu\text{B}/\text{f.u.}$  in the 1<sup>st</sup> SRO layer and is gradually reduces to  $\sim 1.8 \mu\text{B}$  in the 5<sup>th</sup> SRO layer, in good agreement with magnetic measurements.

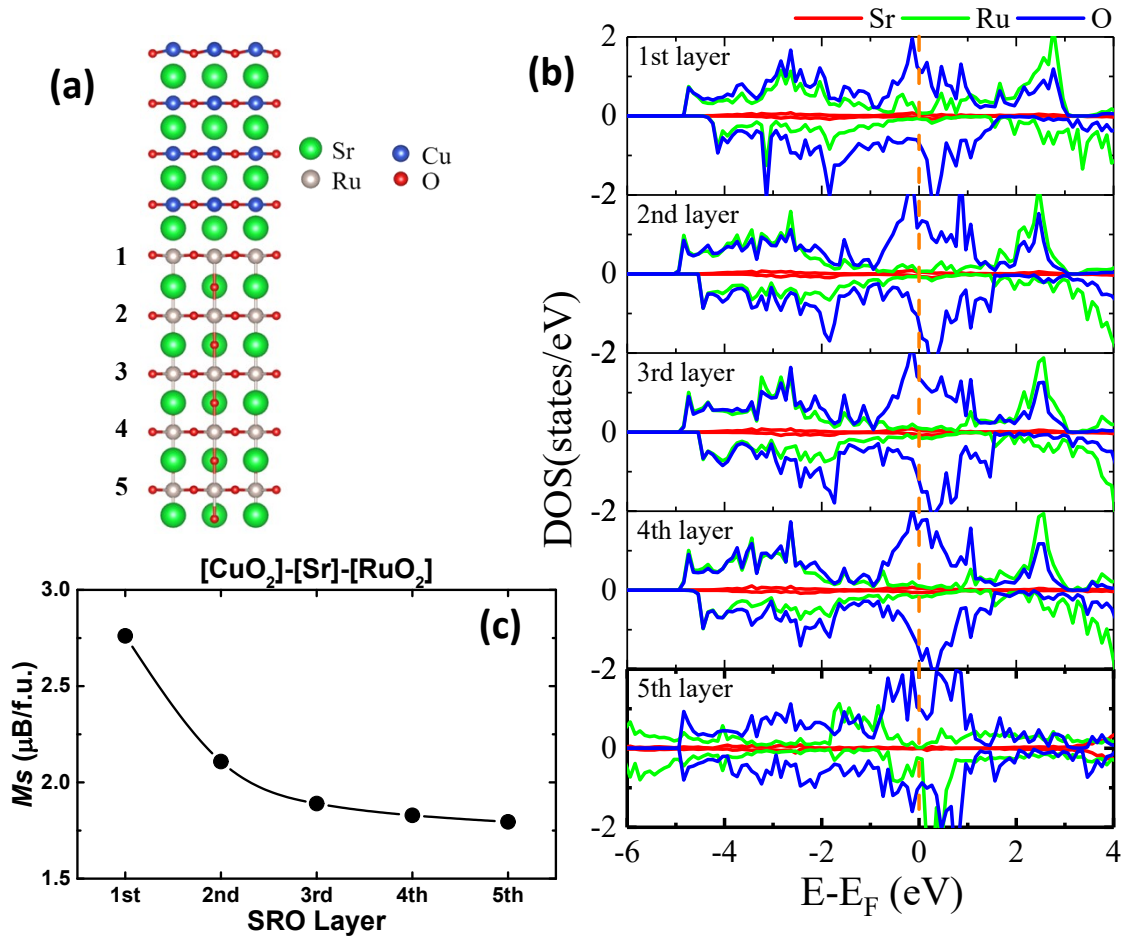

**Figure S5** XAS at O K-edge for the  $\text{SRO}_9$  bare,  $\text{SRO}_{17}$  single layer and  $\text{SCO}_5/\text{SRO}_9$  and  $\text{SCO}_6/\text{SRO}_{17}$  bilayer. All curves were normalized according to its  $e_0$ , pre-edge range, and normalization range parameters. The O K-edge peaks from 528 to 535 eV was divided into three parts, representing the hybridization between O  $2p$  states and the Ru  $t_{2g}$ , Ti  $t_{2g}$  and Ru/Ti  $e_g$  states, respectively. With increased film thickness, the Ti  $t_{2g}$  peak disappears.

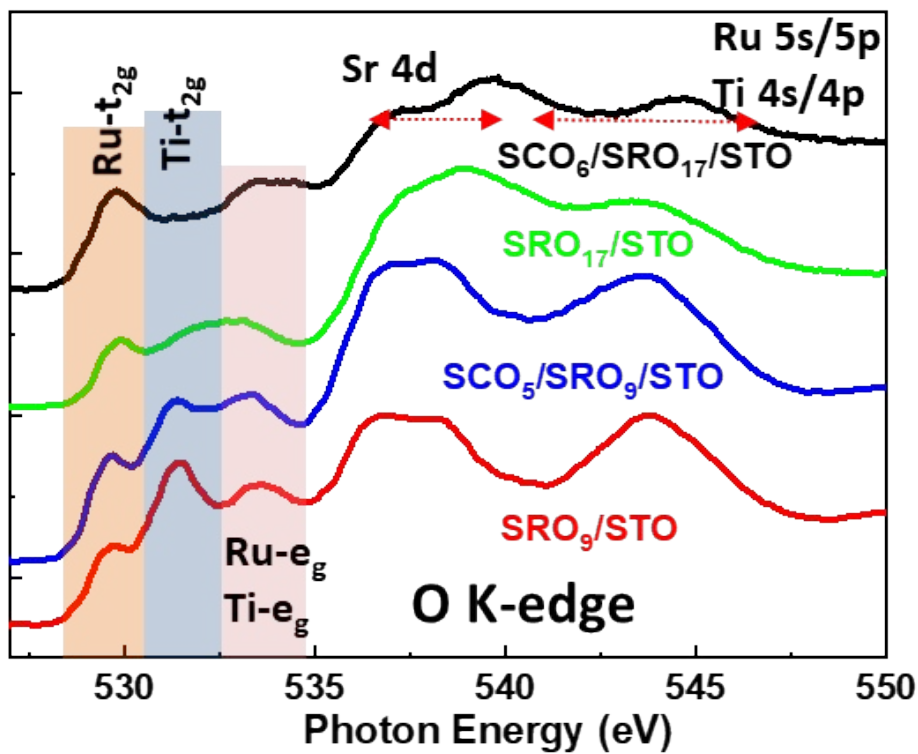

Supplement: d1mh01385h1.pdf [file d1mh01385h1.pdf]
